# Supplementary material
Source: PubMed Central journal article supplement (PMC4643266)
Supplement: mmc1.pdf [file mmc1.pdf]

## Supplemental Information

### Importance of the Voltage Dependence of Cardiac Na/K ATPase Isozymes

Christopher M. Stanley,<sup>1</sup> Dominique G. Gagnon,<sup>1,2</sup> Adam Bernal,<sup>1</sup> Dylan J. Meyer,<sup>1</sup> Joshua J. Rosenthal,<sup>3</sup> and Pablo Artigas<sup>1,\*</sup>

<sup>1</sup>Department of Cell Physiology and Molecular Biophysics, Center for Membrane Protein Research, Texas Tech University Health Sciences Center, Lubbock, Texas; <sup>2</sup>Department of Physics, Texas Tech University, Lubbock, Texas; and <sup>3</sup>Universidad de Puerto Rico, Recinto de Ciencias Médicas, Instituto de Neurobiología, San Juan, Puerto Rico

### Supplementary Information

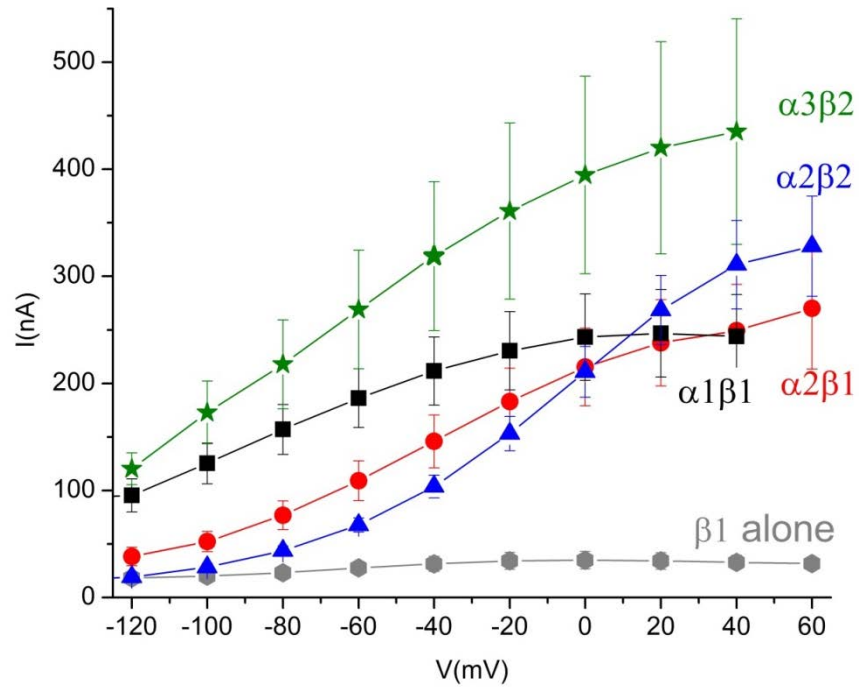

**Supplementary Figure 1.** Mean current induced by 4.5 K<sup>+</sup> in all oocytes shown in Fig. 1 injected with the human cardiac isozymes or with human  $\beta 1$  alone. Uninjected oocytes produced identical signals to  $\beta 1$  injected oocytes (not shown).

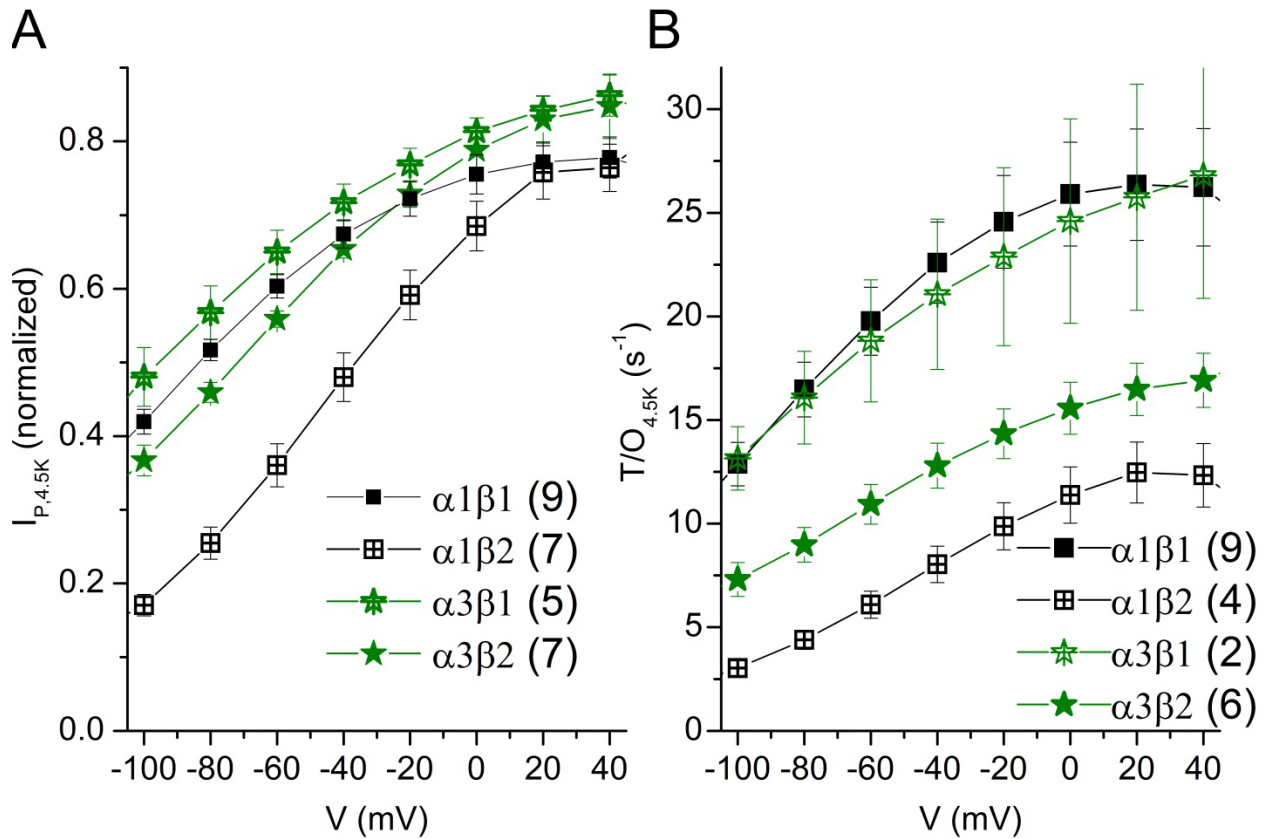

**Supplementary Figure 2.** Voltage dependencies of the two isozyms not shown in Fig. 2 at 4.5 mM  $K^+$ , together with  $\alpha 1\beta 1$  and  $\alpha 3\beta 2$  for comparison **A)** Voltage dependence of 4.5 mM  $K^+$  induced  $I_P$  normalized to the value at +40 mV in 90 mM  $Na^+$  to illustrate the effect of 150 mM  $Na^+$ , for  $\alpha 1\beta 1$  (black solid squares),  $\alpha 1\beta 2$  (black crossed squares)  $\alpha 3\beta 1$  (green crossed stars) and  $\alpha 3\beta 2$  (green solid stars). **B)** T/O rate for the same isozyms. The number of experiments are given in parenthesis.

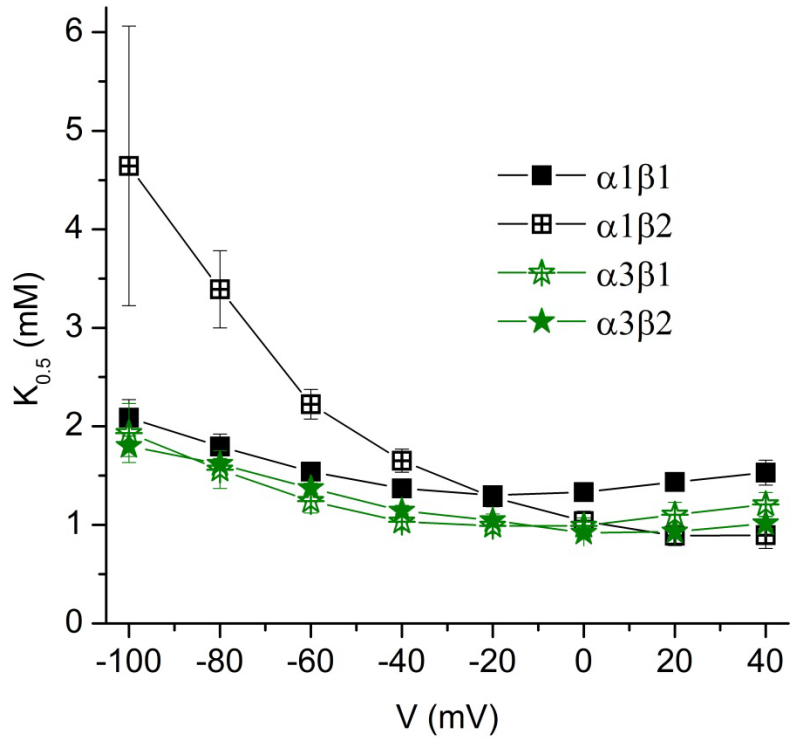

**Supplementary figure 3.** Voltage dependence of apparent affinity for  $K^+$  of the isozymes not shown in Fig. 4A. **A)**  $K_{0.5}$  as a function of voltage at 150 mM  $Na^+$ .  $\alpha 1\beta 1$  (black solid squares);  $\alpha 1\beta 2$  (black crossed squares),  $\alpha 3\beta 1$  (crossed green stars),  $\alpha 3\beta 2$  (solid green stars).
